# Supplementary material
Source: publisher figshare collection journal article supplement (https://aacr.figshare.com/articles/dataset/_/22488890)

% Leukocytes in Tumor Biopsy

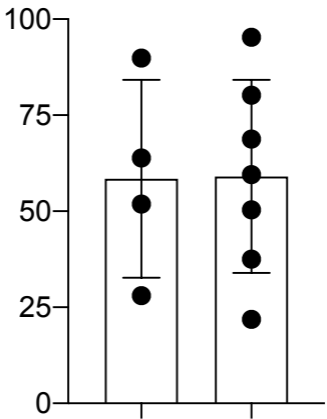

Low Grade

Moderate and High Grade

Supplement: Supplementary file 1 [file 39940508]
